# Supplementary material
Source: publisher figshare collection journal article supplement (https://future-science-group.figshare.com/articles/dataset/_/22200145)
Supplement: Supplementary file 1 [file 1]

**NR3C1 gene methylation and cortisol levels in preterm and healthy full-term infants in the first three months of life.**

**Table S5** – Crude means of the percentage of methylation on days 0, 5, 30 and D\* (day of discharge for preterm infants or D90 for term infants), and estimated beta coefficient of variation over time in both groups.

| CpG sites | Day | Term newborns |        |                |         | Preterm newborns |        |                |         |
|-----------|-----|---------------|--------|----------------|---------|------------------|--------|----------------|---------|
|           |     | Mean (SD)     | beta   | 95%CI          | p-value | Mean (SD)        | beta   | 95%CI          | p-value |
| CpG8      | D0  | 0.04 (0.31)   |        |                |         | 0.00 (0.00)      |        |                |         |
|           | D5  | 0.00 (0.00)   | 0.020  | -0.027; 0.067  | 0.3995  | 0.00 (0.00)      | 0.000  | -              | -       |
|           | D30 | 0.00 (0.00)   |        |                |         | 0.00 (0.00)      |        |                |         |
|           | D*  | 0.17 (0.90)   |        |                |         | 0.00 (0.00)      |        |                |         |
| CpG9      | D0  | 0.00 (0.00)   |        |                |         | 0.05 (0.33)      |        |                |         |
|           | D5  | 0.00 (0.00)   | 0.050  | 0.033; 0.065   | <.0001  | 0.00 (0.00)      | -0.021 | -0.048; 0.007  | 0.1375  |
|           | D30 | 0.06 (0.34)   |        |                |         | 0.00 (0.00)      |        |                |         |
|           | D*  | 0.24 (0.91)   |        |                |         | 0.00 (0.00)      |        |                |         |
| CpG10     | D0  | 0.00 (0.00)   |        |                |         | 0.00 (0.00)      |        |                |         |
|           | D5  | 0.00 (0.00)   | 0.045  | 0.022; 0.068   | 0.0001  | 0.00 (0.00)      | 0.000  | -              | -       |
|           | D30 | 0.00 (0.00)   |        |                |         | 0.00 (0.00)      |        |                |         |
|           | D*  | 0.23 (0.87)   |        |                |         | 0.00 (0.00)      |        |                |         |
| CpG11     | D0  | 0.05 (0.36)   |        |                |         | 0.03 (0.22)      |        |                |         |
|           | D5  | 0.00 (0.00)   | 0.016  | 0.019; 0.050   | 0.3697  | 0.00 (0.00)      | -0.016 | -0.040; 0.007  | 0.1733  |
|           | D30 | 0.08 (0.41)   |        |                |         | 0.00 (0.00)      |        |                |         |
|           | D*  | 0.12 (0.62)   |        |                |         | 0.00 (0.00)      |        |                |         |
| CpG12     | D0  | 2.71 (6.11)   |        |                |         | 3.87 (6.10)      |        |                |         |
|           | D5  | 2.06 (5.45)   | 0.004  | -0.010; 0.018  | 0.5747  | 3.16 (6.49)      | -0.014 | -0.027; -0.001 | 0.034   |
|           | D30 | 2.96 (6.07)   |        |                |         | 2.75 (4.94)      |        |                |         |
|           | D*  | 3.23 (6.16)   |        |                |         | 0.77 (1.11)      |        |                |         |
| CpG13     | D0  | 0.33 (0.70)   |        |                |         | 0.37 (0.70)      |        |                |         |
|           | D5  | 0.28 (0.64)   | 0.021  | 0.010; 0.032   | 0.0003  | 0.26 (0.63)      | 0.005  | -0.008; 0.017  | 0.4787  |
|           | D30 | 1.33 (2.70)   |        |                |         | 0.27 (0.68)      |        |                |         |
|           | D*  | 0.99 (2.78)   |        |                |         | 0.46 (0.83)      |        |                |         |
| CpG14     | D0  | 0.42 (1.46)   |        |                |         | 0.56 (1.45)      |        |                |         |
|           | D5  | 0.30 (0.89)   | -0.013 | -0.052; 0.025  | 0.4960  | 0.00 (0.00)      | -0.012 | -0.063; 0.039  | 0.6441  |
|           | D30 | 0.00 (0.00)   |        |                |         | 0.00 (0.00)      |        |                |         |
|           | D*  | 0.09 (0.48)   |        |                |         | 0.15 (0.50)      |        |                |         |
| CpG15     | D0  | 0.09 (0.48)   |        |                |         | 0.46 (1.36)      |        |                |         |
|           | D5  | 0.00 (0.00)   | -0.015 | -0.062; 0.032  | 0.5375  | 0.00 (0.00)      | -0.048 | -0.078; -0.019 | 0.0013  |
|           | D30 | 0.00 (0.00)   |        |                |         | 0.00 (0.00)      |        |                |         |
|           | D*  | 0.09 (0.49)   |        |                |         | 0.00 (0.00)      |        |                |         |
| CpG16     | D0  | 0.74 (1.67)   |        |                |         | 1.06 (2.12)      |        |                |         |
|           | D5  | 0.00 (0.00)   | -0.025 | -0.053; 0.002  | 0.0727  | 0.27 (0.94)      | -0.061 | -0.079; -0.044 | <.0001  |
|           | D30 | 0.32 (1.19)   |        |                |         | 0.00 (0.00)      |        |                |         |
|           | D*  | 0.08 (0.43)   |        |                |         | 0.00 (0.00)      |        |                |         |
| CpG17     | D0  | 1.09 (2.74)   |        |                |         | 0.62 (1.79)      |        |                |         |
|           | D5  | 0.13 (0.50)   | -0.023 | -0.053; 0.007  | 0.1343  | 0.20 (0.74)      | -0.019 | -0.049; 0.011  | 0.2228  |
|           | D30 | 0.00 (0.00)   |        |                |         | 0.00 (0.00)      |        |                |         |
|           | D*  | 0.17 (0.66)   |        |                |         | 0.12 (0.48)      |        |                |         |
| CpG18     | D0  | 0.26 (1.40)   |        |                |         | 0.47 (1.53)      |        |                |         |
|           | D5  | 0.00 (0.00)   | -0.043 | -0.072; -0.015 | 0.0029  | 0.11 (0.51)      | -0.010 | -0.042; 0.023  | 0.5636  |
|           | D30 | 0.00 (0.00)   |        |                |         | 0.00 (0.00)      |        |                |         |
|           | D*  | 0.00 (0.00)   |        |                |         | 0.18 (0.71)      |        |                |         |
| CpG19     | D0  | 1.31 (3.13)   |        |                |         | 1.19 (2.47)      |        |                |         |
|           | D5  | 1.37 (3.36)   | -0.007 | -0.025; 0.012  | 0.4591  | 0.58 (2.51)      | -0.033 | -0.055; -0.012 | 0.0020  |
|           | D30 | 1.32 (2.97)   |        |                |         | 0.35 (1.43)      |        |                |         |
|           | D*  | 0.79 (3.11)   |        |                |         | 0.08 (0.34)      |        |                |         |
| CpG20     | D0  | 0.06 (0.39)   |        |                |         | 0.00 (0.00)      |        |                |         |
|           | D5  | 0.00 (0.00)   | -0.024 | -0.053; 0.005  | 0.1040  | 0.00 (0.00)      | 0.000  | -              | -       |
|           | D30 | 0.00 (0.00)   |        |                |         | 0.00 (0.00)      |        |                |         |
|           | D*  | 0.00 (0.00)   |        |                |         | 0.00 (0.00)      |        |                |         |

**Table S5 (cont.)** – Crude means of the percentage of methylation on days 0, 5, 30 and D\* (day of discharge for preterm infants or D90 for term infants), and estimated beta coefficient of variation over time in both groups.

| CpG sites | Day | Term newborns |        |                |                  | Preterm newborns |        |                |                  |
|-----------|-----|---------------|--------|----------------|------------------|------------------|--------|----------------|------------------|
|           |     | Mean (SD)     | beta   | 95%CI          | p-value          | Mean (SD)        | beta   | 95%CI          | p-value          |
| CpG21     | D0  | 0.76 (2.16)   |        |                |                  | 0.64 (1.54)      |        |                |                  |
|           | D5  | 1.08 (2.25)   | 0.017  | 0.008; 0.026   | <b>0.0001</b>    | 0.82 (1.93)      | -0.009 | -0.020; 0.002  | 0.1174           |
|           | D30 | 2.94 (3.72)   |        |                |                  | 0.54 (1.47)      |        |                |                  |
|           | D*  | 2.93 (3.97)   |        |                |                  | 0.59 (1.16)      |        |                |                  |
| CpG22     | D0  | 0.10 (0.54)   |        |                |                  | 0.50 (1.37)      |        |                |                  |
|           | D5  | 0.00 (0.00)   | -0.029 | -0.059; 0.000  | 0.0530           | 0.13 (0.53)      | -0.004 | -0.029; 0.021  | 0.7477           |
|           | D30 | 0.00 (0.00)   |        |                |                  | 0.11 (0.46)      |        |                |                  |
|           | D*  | 0.00 (0.00)   |        |                |                  | 0.27 (0.70)      |        |                |                  |
| CpG23     | D0  | 0.00 (0.00)   |        |                |                  | 0.09 (0.52)      |        |                |                  |
|           | D5  | 0.00 (0.00)   | 0.000  | -              | -                | 0.00 (0.00)      | 0.004  | -0.043; 0.052  | 0.8582           |
|           | D30 | 0.00 (0.00)   |        |                |                  | 0.00 (0.00)      |        |                |                  |
|           | D*  | 0.00 (0.00)   |        |                |                  | 0.08 (0.41)      |        |                |                  |
| CpG24     | D0  | 0.30 (0.96)   |        |                |                  | 0.57 (1.47)      |        |                |                  |
|           | D5  | 0.00 (0.00)   | -0.044 | -0.063; -0.025 | <b>&lt;.0001</b> | 0.28 (1.30)      | -0.006 | -0.034; 0.022  | 0.6606           |
|           | D30 | 0.00 (0.00)   |        |                |                  | 0.00 (0.00)      |        |                |                  |
|           | D*  | 0.00 (0.00)   |        |                |                  | 0.28 (0.84)      |        |                |                  |
| CpG25     | D0  | 0.00 (0.00)   |        |                |                  | 0.00 (0.00)      |        |                |                  |
|           | D5  | 0.00 (0.00)   | -      | -              | -                | 0.00 (0.00)      | -      | -              | -                |
|           | D30 | 0.00 (0.00)   |        |                |                  | 0.00 (0.00)      |        |                |                  |
|           | D*  | 0.00 (0.00)   |        |                |                  | 0.00 (0.00)      |        |                |                  |
| CpG26     | D0  | 0.00 (0.00)   |        |                |                  | 0.09 (0.53)      |        |                |                  |
|           | D5  | 0.09 (0.47)   | -0.025 | -0.049; -0.001 | <b>0.0388</b>    | 0.00 (0.00)      | -0.028 | -0.059; 0.004  | 0.0896           |
|           | D30 | 0.00 (0.00)   |        |                |                  | 0.00 (0.00)      |        |                |                  |
|           | D*  | 0.00 (0.00)   |        |                |                  | 0.00 (0.00)      |        |                |                  |
| CpG27     | D0  | 0.00 (0.00)   |        |                |                  | 0.00 (0.00)      |        |                |                  |
|           | D5  | 0.58 (3.11)   | -0.051 | -0.080; -0.022 | <b>0.0005</b>    | 0.00 (0.00)      | 0.000  | -              | -                |
|           | D30 | 0.00 (0.00)   |        |                |                  | 0.00 (0.00)      |        |                |                  |
|           | D*  | 0.00 (0.00)   |        |                |                  | 0.00 (0.00)      |        |                |                  |
| CpG28     | D0  | 0.00 (0.00)   |        |                |                  | 0.00 (0.00)      |        |                |                  |
|           | D5  | 0.00 (0.00)   | 0.000  | 0.000; 0.000   | -                | 0.00 (0.00)      | 0.051  | 0.046; 0.056   | <b>&lt;.0001</b> |
|           | D30 | 0.00 (0.00)   |        |                |                  | 0.21 (0.52)      |        |                |                  |
|           | Dd  | 0.00 (0.00)   |        |                |                  | 0.05 (0.26)      |        |                |                  |
| CpG29     | D0  | 0.30 (1.74)   |        |                |                  | 0.00 (0.00)      |        |                |                  |
|           | D5  | 0.27 (1.46)   | 0.010  | -0.019; 0.039  | 0.4818           | 0.00 (0.00)      | 0.000  | -              | -                |
|           | D30 | 0.59 (2.43)   |        |                |                  | 0.00 (0.00)      |        |                |                  |
|           | D*  | 0.49 (2.31)   |        |                |                  | 0.00 (0.00)      |        |                |                  |
| CpG30     | D0  | 0.19 (0.75)   |        |                |                  | 0.18 (0.79)      |        |                |                  |
|           | D5  | 0.15 (0.56)   | -0.045 | -0.061; -0.029 | <b>&lt;.0001</b> | 0.05 (0.29)      | -0.040 | -0.066; -0.014 | <b>0.0030</b>    |
|           | D30 | 0.00 (0.00)   |        |                |                  | 0.00 (0.00)      |        |                |                  |
|           | D*  | 0.00 (0.00)   |        |                |                  | 0.00 (0.00)      |        |                |                  |
| CpG31     | D0  | 0.31 (1.05)   |        |                |                  | 0.29 (0.94)      |        |                |                  |
|           | D5  | 0.25 (0.67)   | -0.052 | -0.066; -0.037 | <b>&lt;.0001</b> | 0.06 (0.34)      | -0.045 | -0.068; -0.022 | <b>0.0001</b>    |
|           | D30 | 0.00 (0.00)   |        |                |                  | 0.00 (0.00)      |        |                |                  |
|           | D*  | 0.00 (0.00)   |        |                |                  | 0.00 (0.00)      |        |                |                  |
| CpG32     | D0  | 0.00 (0.00)   |        |                |                  | 0.00 (0.00)      |        |                |                  |
|           | D5  | 0.00 (0.00)   | 0.062  | 0.046; 0.078   | <b>&lt;.0001</b> | 0.00 (0.00)      | 0.092  | 0.055; 0.130   | <b>&lt;.0001</b> |
|           | D30 | 0.32 (0.96)   |        |                |                  | 0.25 (0.67)      |        |                |                  |
|           | D*  | 0.00 (0.00)   |        |                |                  | 0.00 (0.00)      |        |                |                  |
| CpG33     | D0  | 0.22 (0.90)   |        |                |                  | 0.20 (0.91)      |        |                |                  |
|           | D5  | 0.27 (0.85)   | -0.052 | -0.065; -0.039 | <b>&lt;.0001</b> | 0.00 (0.00)      | -0.004 | -0.045; 0.037  | 0.8470           |
|           | D30 | 0.00 (0.00)   |        |                |                  | 0.00 (0.00)      |        |                |                  |
|           | D*  | 0.00 (0.00)   |        |                |                  | 0.08 (0.46)      |        |                |                  |

**Table S5 (cont.)** – Crude means of the percentage of methylation on days 0, 5, 30 and D\* (day of discharge for preterm infants or D90 for term infants), and estimated beta coefficient of variation over time in both groups.

| CpG sites          | Day | Term newborns |        |                |                  | Preterm newborns |        |                |               |
|--------------------|-----|---------------|--------|----------------|------------------|------------------|--------|----------------|---------------|
|                    |     | Mean (SD)     | beta   | 95%CI          | p-value          | Mean (SD)        | beta   | 95%CI          | p-value       |
| CpG34              | D0  | 0.08 (0.49)   |        |                |                  | 0.12 (0.58)      |        |                |               |
|                    | D5  | 0.14 (0.53)   | 0.011  | -0.025; 0.047  | 0.5359           | 0.00 (0.00)      | -0.033 | -0.058; -0.007 | <b>0.013</b>  |
|                    | D30 | 0.00 (0.00)   |        |                |                  | 0.00 (0.00)      |        |                |               |
|                    | D*  | 0.29 (1.07)   |        |                |                  | 0.00 (0.00)      |        |                |               |
| CpG35              | D0  | 0.00 (0.00)   |        |                |                  | 0.03 (0.20)      |        |                |               |
|                    | D5  | 0.00 (0.00)   | 0.000  | -              | -                | 0.00 (0.00)      | -0.016 | -0.039; 0.007  | 0.1788        |
|                    | D30 | 0.00 (0.00)   |        |                |                  | 0.00 (0.00)      |        |                |               |
|                    | D*  | 0.00 (0.00)   |        |                |                  | 0.00 (0.00)      |        |                |               |
| CpG36              | D0  | 0.67 (1.98)   |        |                |                  | 0.08 (0.38)      |        |                |               |
|                    | D5  | 0.30 (0.81)   | 0.030  | 0.017; 0.042   | <b>&lt;.0001</b> | 0.55 (1.77)      | 0.000  | -0.014; 0.015  | 0.9756        |
|                    | D30 | 3.78 (6.01)   |        |                |                  | 0.24 (0.84)      |        |                |               |
|                    | D*  | 1.83 (2.47)   |        |                |                  | 0.25 (0.80)      |        |                |               |
| CpG37              | D0  | 0.31 (1.13)   |        |                |                  | 0.30 (1.41)      |        |                |               |
|                    | D5  | 0.19 (0.74)   | 0.022  | 0.005; 0.039   | <b>0.0112</b>    | 0.21 (0.81)      | -0.013 | -0.050; 0.023  | 0.4715        |
|                    | D30 | 1.50 (4.05)   |        |                |                  | 0.06 (0.39)      |        |                |               |
|                    | D*  | 1.23 (4.05)   |        |                |                  | 0.11 (0.49)      |        |                |               |
| CpG38              | D0  | 2.10 (2.45)   |        |                |                  | 2.28 (2.87)      |        |                |               |
|                    | D5  | 2.28 (2.28)   | 0.014  | 0.007; 0.022   | <b>0.0002</b>    | 1.82 (2.00)      | 0.0028 | -0.008; 0.014  | 0.6250        |
|                    | D30 | 3.70 (3.96)   |        |                |                  | 1.70 (1.72)      |        |                |               |
|                    | D*  | 4.02 (3.72)   |        |                |                  | 2.83 (4.76)      |        |                |               |
| CpG39              | D0  | 1.40 (2.60)   |        |                |                  | 2.06 (3.26)      |        |                |               |
|                    | D5  | 1.84 (2.31)   | -0.010 | -0.021; 0.020  | 0.100            | 1.24 1.95        | -0.007 | -0.016; 0.003  | 0.1873        |
|                    | D30 | 1.52 (3.46)   |        |                |                  | 1.12 (1.40)      |        |                |               |
|                    | D*  | 0.76 (1.51)   |        |                |                  | 1.14 (1.31)      |        |                |               |
| CpG40              | D0  | 0.00 (0.00)   |        |                |                  | 0.61 (2.94)      |        |                |               |
|                    | D5  | 0.98 (2.66)   | -0.058 | -0.079; -0.037 | <b>&lt;.0001</b> | 0.71 (2.65)      | -0.015 | -0.039; 0.009  | 0.2162        |
|                    | D30 | 0.00 (0.00)   |        |                |                  | 0.31 (0.77)      |        |                |               |
|                    | D*  | 0.00 (0.00)   |        |                |                  | 0.24 (0.74)      |        |                |               |
| CpG41              | D0  | 0.00 (0.00)   |        |                |                  | 0.13 (0.68)      |        |                |               |
|                    | D5  | 0.00 (0.00)   | 0.000  | -              | -                | 0.05 (0.30)      | -0.036 | -0.060; -0.011 | <b>0.0049</b> |
|                    | D30 | 0.00 (0.00)   |        |                |                  | 0.00 (0.00)      |        |                |               |
|                    | D*  | 0.00 (0.00)   |        |                |                  | 0.00 (0.00)      |        |                |               |
| CpG42              | D0  | 0.32 (0.94)   |        |                |                  | 2.15 (3.04)      |        |                |               |
|                    | D5  | 1.97 (6.36)   | -0.016 | -0.042; 0.011  | 0.2403           | 1.50 (1.49)      | -0.004 | -0.013; 0.004  | 0.2910        |
|                    | D30 | 0.11 (0.56)   |        |                |                  | 1.13 (1.32)      |        |                |               |
|                    | D*  | 0.31 (0.75)   |        |                |                  | 1.44 (1.42)      |        |                |               |
| CpG43              | D0  | 0.00 (0.00)   |        |                |                  | 0.19 (0.76)      |        |                |               |
|                    | D5  | 0.14 (0.65)   | -0.030 | -0.060; 0.001  | <b>0.044</b>     | 0.07 (0.40)      | -0.017 | -0.042; 0.008  | 0.1882        |
|                    | D30 | 0.00 (0.00)   |        |                |                  | 0.09 (0.32)      |        |                |               |
|                    | D*  | 0.00 (0.00)   |        |                |                  | 0.03 (0.18)      |        |                |               |
| CpG44              | D0  | 0.00 (0.00)   |        |                |                  | 0.11 (0.66)      |        |                |               |
|                    | D5  | 0.22 (0.72)   | -0.036 | -0.058; -0.014 | <b>0.0016</b>    | 0.00 (0.00)      | -0.010 | -0.046; 0.027  | 0.6076        |
|                    | D30 | 0.00 (0.00)   |        |                |                  | 0.03 (0.17)      |        |                |               |
|                    | D*  | 0.00 (0.00)   |        |                |                  | 0.03 (0.15)      |        |                |               |
| CpG45              | D0  | 0.12 (0.46)   |        |                |                  | 0.29 (1.01)      |        |                |               |
|                    | D5  | 0.24 (0.82)   | -0.014 | -0.052; 0.024  | 0.4644           | 0.53 (1.17)      | -0.001 | -0.026; 0.008  | 0.3004        |
|                    | D30 | 0.00 (0.00)   |        |                |                  | 0.25 (0.64)      |        |                |               |
|                    | D*  | 0.08 (0.35)   |        |                |                  | 0.17 (0.48)      |        |                |               |
| CpG46              | D0  | 0.00 (0.00)   |        |                |                  | 0.16 (0.91)      |        |                |               |
|                    | D5  | 0.29 (1.01)   | -0.041 | -0.064; -0.018 | <b>0.0005</b>    | 0.12 (0.60)      | -0.016 | 0.052; 0.020   | 0.3877        |
|                    | D30 | 0.00 (0.00)   |        |                |                  | 0.00 (0.00)      |        |                |               |
|                    | D*  | 0.00 (0.00)   |        |                |                  | 0.04 (0.25)      |        |                |               |
| CpG47              | D0  | 0.04 (0.23)   |        |                |                  | 0.93 (2.79)      |        |                |               |
|                    | D5  | 0.41 (1.11)   | 0.020  | -0.010; 0.051  | 0.1971           | 0.33 (0.68)      | -0.008 | -0.022; 0.005  | 0.2176        |
|                    | D30 | 0.46 (1.95)   |        |                |                  | 0.42 (0.70)      |        |                |               |
|                    | D*  | 0.94 (2.17)   |        |                |                  | 0.45 (0.67)      |        |                |               |
| <b>Total Meth.</b> | D0  | 0.40 (1.76)   |        |                |                  | 0.54 (1.94)      |        |                |               |
|                    | D5  | 0.44 (1.90)   | 0.006  | -0.005; 0.017  | 0.3116           | 0.36 (1.64)      | -0.008 | -0.014; -0.001 | <b>0.0241</b> |
|                    | D30 | 0.59 (2.33)   |        |                |                  | 0.27 (1.21)      |        |                |               |
|                    | D*  | 0.51 (2.09)   |        |                |                  | 0.28 (1.12)      |        |                |               |

Total Meth – total methylation
