# Supplementary material
Source: publisher figshare collection journal article supplement (https://future-science-group.figshare.com/articles/dataset/_/22200145)
Supplement: Supplementary file 2 [file 1]

# **NR3C1 gene methylation and cortisol levels in preterm and healthy full-term infants in the first three months of life.**

**Table S7.** Median and mean z-scores of cortisol levels at days 5, 30, and D\* (day of discharge for preterm newborns or day 90 for term infants).

| Day | No. | Term newborns |       |       |         |         |        |      |      | No. | Preterm newborns |       |       |         |         |        |       |       | <i>P</i> <sup>a</sup> |
|-----|-----|---------------|-------|-------|---------|---------|--------|------|------|-----|------------------|-------|-------|---------|---------|--------|-------|-------|-----------------------|
|     |     | Median        | P25   | P75   | Minimum | Maximum | Mean   | SEM  | SD   |     | Median           | P25   | P75   | Minimum | Maximum | Mean   | SEM   | SD    |                       |
| D5  | 36  | -0.325        | -0.35 | -0.26 | -0.36   | -0.07   | -0.295 | 0.01 | 0.07 | 46  | -0.115           | -0.21 | 0.023 | -0.33   | 6.18    | 0.232  | 0.191 | 1.293 | < <b>0.0001</b> *     |
| D30 | 23  | -0.040        | -0.63 | 1.20  | -1.07   | 4.07    | 0.267  | 0.26 | 1.25 | 41  | -0.400           | -0.71 | 1.740 | -1.00   | 1.74    | -0.150 | 0.116 | 0.742 | 0.245                 |
| D*  | 28  | -0.055        | -0.61 | 0.53  | -1.28   | 2.83    | 0.050  | 0.18 | 0.96 | 38  | -0.325           | 0.74  | 0.820 | -1.10   | 2.75    | 0.039  | 0.155 | 0.955 | 0.866                 |

SEM – Standard error of mean; SD – Standard deviation; <sup>a</sup>Mann-Whitney U test; \*statistically significant difference between the groups.

**Table S8 -** Crude means z-scores of cortisol levels on days 0, 5, 30 and D\* (day of discharge for preterm newborns or day 90 for term infants) and estimated beta coefficient of changes over time in both groups.

| Day | Term newborns |           |          |                  | Preterm newborns |          |          |                  |
|-----|---------------|-----------|----------|------------------|------------------|----------|----------|------------------|
|     | Mean (SD)     | beta      | SE       | <i>p-value</i> * | Mean (SD)        | beta     | SE       | <i>p-value</i> * |
| D5  | -0.295 (0.07) |           |          |                  | 0.232 (1.293)    |          |          |                  |
| D30 | 0.267 (1.25)  | 0.0006696 | 0.002690 | <b>0.0177</b>    | -0.150 (0.742)   | -0.00152 | 0.003206 | 0.6375           |
| D*  | 0.050 (0.96)  |           |          |                  | 0.039 (0.955)    |          |          |                  |

SD – Standard deviation; \*The mixed procedure in SAS on Demand for Academics (SAS Institute Inc., Cary, NC, USA).

**Table S9 –** Crude means and estimated changes in the z-scores of cortisol levels on day 5, 30 and D\* (day of discharge for preterm newborns or day 90 for term infants) in premature newborns compared to term newborns.

| Day | Term newborns |           | Preterm newborns |            | Preterm compared to term infants |          |                  |
|-----|---------------|-----------|------------------|------------|----------------------------------|----------|------------------|
|     | Mean (SD)     | △         | Mean (SD)        | △          | beta                             | SE       | <i>p-value</i> * |
| D5  | -0.295        | -         | 0.232            | -          |                                  |          |                  |
| D30 | 0.267         | 0.1258445 | -0.150           | -0.0708335 | -0.00787                         | 0.004553 | 0.0879           |
| D*  | 0.05          | 0.3246789 | 0.039            | -0.1827504 |                                  |          |                  |

SD – Standard deviation; \*The mixed procedure in SAS OnDemand for Academics (SAS Institute Inc., Cary, NC, USA).
