# Supplementary material
Source: publisher figshare collection journal article supplement (https://future-science-group.figshare.com/articles/dataset/_/22200145)
Supplement: Supplementary file 4 [file 1]

# *NR3C1* gene methylation and cortisol levels in preterm and healthy full-term infants in the first three months of life.

**Table S1.** Percentage of *NR3C1* gene methylation at **D0 (birth)** - Exon 1F, CpG sites 8 to 47.

| Sites              | PRETERM INFANTS (n=46) |        |     |      |         |         |      |     |      | TERM INFANTS (n=49) |        |     |      |         |         |      |     |      | <i>P</i> <sup>a</sup> |
|--------------------|------------------------|--------|-----|------|---------|---------|------|-----|------|---------------------|--------|-----|------|---------|---------|------|-----|------|-----------------------|
|                    | No.                    | Median | P25 | P75  | Minimum | Maximum | Mean | SEM | SD   | No.                 | Median | P25 | P75  | Minimum | Maximum | Mean | SEM | SD   |                       |
| CpG 8              | 46                     | .00    | .00 | .00  | .00     | .00     | .00  | .00 | .00  | 48                  | .00    | .00 | .00  | .00     | 2.14    | .04  | .04 | .31  | 0.328                 |
| CpG 9              | 46                     | .00    | .00 | .00  | .00     | 2.23    | .05  | .05 | .33  | 48                  | .00    | .00 | .00  | .00     | .00     | .00  | .00 | .00  | 0.307                 |
| CpG 10             | 46                     | .00    | .00 | .00  | .00     | .00     | .00  | .00 | .00  | 48                  | .00    | .00 | .00  | .00     | .00     | .00  | .00 | .00  | 1.000                 |
| CpG 11             | 45                     | .00    | .00 | .00  | .00     | 1.45    | .03  | .03 | .22  | 48                  | .00    | .00 | .00  | .00     | 2.48    | .05  | .05 | .36  | 0.976                 |
| <b>CpG 12#</b>     | 45                     | .00    | .00 | 3.25 | .00     | 19.84   | 3.87 | .91 | 6.10 | 48                  | .00    | .00 | .00  | .00     | 20.27   | 2.71 | .88 | 6.11 | <b>0.029*</b>         |
| CpG 13             | 45                     | .00    | .00 | .00  | .00     | 1.84    | .37  | .10 | .70  | 48                  | .00    | .00 | .00  | .00     | 2.28    | .33  | .10 | .70  | 0.752                 |
| CpG 14             | 12                     | .00    | .00 | .00  | .00     | 4.86    | .56  | .42 | 1.45 | 12                  | .00    | .00 | .00  | .00     | 5.06    | .42  | .42 | 1.46 | 0.799                 |
| CpG 15             | 15                     | .00    | .00 | .00  | .00     | 5.04    | .46  | .35 | 1.36 | 14                  | .00    | .00 | .00  | .00     | 4.49    | .51  | .36 | 1.35 | 1.000                 |
| CpG 16             | 21                     | .00    | .00 | .00  | .00     | 7.21    | 1.06 | .46 | 2.12 | 17                  | .00    | .00 | .00  | .00     | 4.81    | .74  | .40 | 1.67 | 0.750                 |
| CpG 17             | 40                     | .00    | .00 | .00  | .00     | 7.28    | .62  | .28 | 1.79 | 43                  | .00    | .00 | .00  | .00     | 14.97   | 1.09 | .42 | 2.74 | 0.349                 |
| CpG 18             | 41                     | .00    | .00 | .00  | .00     | 6.65    | .47  | .24 | 1.53 | 45                  | .00    | .00 | .00  | .00     | 9.01    | .26  | .21 | 1.40 | 0.337                 |
| CpG 19             | 42                     | .00    | .00 | .00  | .00     | 10.81   | 1.19 | .38 | 2.47 | 45                  | .00    | .00 | .00  | .00     | 11.90   | 1.31 | .47 | 3.13 | 0.751                 |
| CpG 20             | 42                     | .00    | .00 | .00  | .00     | .00     | .00  | .00 | .00  | 44                  | .00    | .00 | .00  | .00     | 2.56    | .06  | .06 | .39  | 0.329                 |
| CpG 21             | 42                     | .00    | .00 | .00  | .00     | 6.13    | .64  | .24 | 1.54 | 44                  | .00    | .00 | .00  | .00     | 11.08   | .76  | .33 | 2.16 | 0.774                 |
| CpG 22             | 31                     | .00    | .00 | .00  | .00     | 5.13    | .50  | .25 | 1.37 | 28                  | .00    | .00 | .00  | .00     | 2.85    | .10  | .10 | .54  | 0.187                 |
| CpG 23             | 34                     | .00    | .00 | .00  | .00     | 3.03    | .09  | .09 | .52  | 31                  | .00    | .00 | .00  | .00     | .00     | .00  | .00 | .00  | 0.340                 |
| CpG 24             | 35                     | .00    | .00 | .00  | .00     | 5.61    | .57  | .25 | 1.47 | 31                  | .00    | .00 | .00  | .00     | 3.95    | .30  | .17 | .96  | 0.518                 |
| CpG 25             | 35                     | .00    | .00 | .00  | .00     | .00     | .00  | .00 | .00  | 31                  | .00    | .00 | .00  | .00     | .00     | .00  | .00 | .00  | 1.000                 |
| CpG 26             | 35                     | .00    | .00 | .00  | .00     | 3.12    | .09  | .09 | .53  | 31                  | .00    | .00 | .00  | .00     | .00     | .00  | .00 | .00  | 0.347                 |
| CpG 27             | 35                     | .00    | .00 | .00  | .00     | .00     | .00  | .00 | .00  | 32                  | .00    | .00 | .00  | .00     | .00     | .00  | .00 | .00  | 1.000                 |
| CpG 28             | 35                     | .00    | .00 | .00  | .00     | .00     | .00  | .00 | .00  | 33                  | .00    | .00 | .00  | .00     | .00     | .00  | .00 | .00  | 1.000                 |
| CpG 29             | 36                     | .00    | .00 | .00  | .00     | .00     | .00  | .00 | .00  | 34                  | .00    | .00 | .00  | .00     | 10.12   | .30  | .30 | 1.74 | 0.303                 |
| CpG 30             | 39                     | .00    | .00 | .00  | .00     | 3.57    | .18  | .13 | .79  | 31                  | .00    | .00 | .00  | .00     | 3.19    | .19  | .13 | .75  | 0.860                 |
| CpG 31             | 31                     | .00    | .00 | .00  | .00     | 4.03    | .29  | .17 | .94  | 23                  | .00    | .00 | .00  | .00     | 4.24    | .31  | .22 | 1.05 | 0.931                 |
| CpG 32             | 14                     | .00    | .00 | .00  | .00     | .00     | .00  | .00 | .00  | 19                  | .00    | .00 | .00  | .00     | .00     | .00  | .00 | .00  | 1.000                 |
| CpG 33             | 42                     | .00    | .00 | .00  | .00     | 4.73    | .20  | .14 | .91  | 35                  | .00    | .00 | .00  | .00     | 4.27    | .22  | .15 | .90  | 0.873                 |
| CpG 34             | 43                     | .00    | .00 | .00  | .00     | 3.23    | .12  | .09 | .58  | 36                  | .00    | .00 | .00  | .00     | 2.94    | .08  | .08 | .49  | 0.666                 |
| CpG 35             | 43                     | .00    | .00 | .00  | .00     | 1.31    | .03  | .03 | .20  | 39                  | .00    | .00 | .00  | .00     | .00     | .00  | .00 | .00  | 0.341                 |
| CpG 36             | 43                     | .00    | .00 | .00  | .00     | 1.99    | .08  | .06 | .38  | 39                  | .00    | .00 | .00  | .00     | 8.76    | .67  | .32 | 1.98 | 0.159                 |
| CpG 37             | 40                     | .00    | .00 | .00  | .00     | 7.99    | .30  | .22 | 1.41 | 47                  | .00    | .00 | .00  | .00     | 6.05    | .31  | .17 | 1.13 | 0.561                 |
| CpG 38             | 43                     | 2.43   | .00 | 2.91 | .00     | 12.65   | 2.28 | .44 | 2.87 | 47                  | 2.11   | .00 | 3.42 | .00     | 11.03   | 2.10 | .36 | 2.45 | 0.923                 |
| CpG 39             | 43                     | 1.62   | .00 | 2.81 | .00     | 13.77   | 2.06 | .50 | 3.26 | 47                  | .00    | .00 | 2.73 | .00     | 12.19   | 1.40 | .38 | 2.60 | 0.182                 |
| CpG 40             | 33                     | .00    | .00 | .00  | .00     | 16.57   | .61  | .51 | 2.94 | 26                  | .00    | .00 | .00  | .00     | .00     | .00  | .00 | .00  | 0.205                 |
| CpG 41             | 29                     | .00    | .00 | .00  | .00     | 3.66    | .13  | .13 | .68  | 26                  | .00    | .00 | .00  | .00     | .00     | .00  | .00 | .00  | 0.344                 |
| <b>CpG 42#</b>     | 33                     | 2.16   | .00 | 3.13 | .00     | 15.07   | 2.15 | .53 | 3.04 | 27                  | .00    | .00 | .00  | .00     | 3.30    | .32  | .18 | .94  | <b>0.001*</b>         |
| CpG 43             | 33                     | .00    | .00 | .00  | .00     | 3.43    | .19  | .13 | .76  | 28                  | .00    | .00 | .00  | .00     | .00     | .00  | .00 | .00  | 0.189                 |
| CpG 44             | 33                     | .00    | .00 | .00  | .00     | 3.79    | .11  | .11 | .66  | 29                  | .00    | .00 | .00  | .00     | .00     | .00  | .00 | .00  | 0.349                 |
| CpG 45             | 33                     | .00    | .00 | .00  | .00     | 5.41    | .29  | .18 | 1.01 | 30                  | .00    | .00 | .00  | .00     | 2.21    | .12  | .08 | .46  | 0.466                 |
| CpG 46             | 34                     | .00    | .00 | .00  | .00     | 5.32    | .16  | .16 | .91  | 33                  | .00    | .00 | .00  | .00     | .00     | .00  | .00 | .00  | 0.325                 |
| <b>CpG 47#</b>     | 37                     | .00    | .00 | 1.08 | .00     | 16.15   | .93  | .46 | 2.79 | 34                  | .00    | .00 | .00  | .00     | 1.36    | .04  | .04 | .23  | <b>0.005*</b>         |
| <b>Total meth.</b> |                        | .00    | .00 | .00  | .00     | 19.84   | .54  | .05 | 1.94 |                     | .00    | .00 | .00  | .00     | 20.27   | .40  | .05 | 1.76 | <b>0.001*</b>         |

D0 – day of birth; SEM – Standard error of mean; SD – Standard deviation; Total meth. – total methylation; <sup>a</sup>Mann-Whitney U test; \*statistically significant difference between the groups; #percentage of methylation in preterm infants higher than in term infants.

# NR3C1 gene methylation and cortisol levels in preterm and healthy full-term infants in the first three months of life.

**Table S2.** Percentage of *NR3C1* gene methylation at D5 - Exon 1F, CpG sites 8 to 47.

| Sites       | PRETERM INFANTS (n=46) |        |     |      |         |         |      |     |      | TERM INFANTS (n=36) |        |     |      |         |         |      |      |      | P <sup>a</sup> |
|-------------|------------------------|--------|-----|------|---------|---------|------|-----|------|---------------------|--------|-----|------|---------|---------|------|------|------|----------------|
|             | No.                    | Median | P25 | P75  | Minimum | Maximum | Mean | SEM | SD   | No.                 | Median | P25 | P75  | Minimum | Maximum | Mean | SEM  | SD   |                |
| CpG 8       | 45                     | .00    | .00 | .00  | .00     | .00     | .00  | .00 | .00  | 34                  | .00    | .00 | .00  | .00     | .00     | .00  | .00  | .00  | 1.000          |
| CpG 9       | 45                     | .00    | .00 | .00  | .00     | .00     | .00  | .00 | .00  | 35                  | .00    | .00 | .00  | .00     | .00     | .00  | .00  | .00  | 1.000          |
| CpG 10      | 46                     | .00    | .00 | .00  | .00     | .00     | .00  | .00 | .00  | 35                  | .00    | .00 | .00  | .00     | .00     | .00  | .00  | .00  | 1.000          |
| CpG 11      | 46                     | .00    | .00 | .00  | .00     | .00     | .00  | .00 | .00  | 35                  | .00    | .00 | .00  | .00     | .00     | .00  | .00  | .00  | 1.000          |
| CpG 12      | 46                     | .00    | .00 | 2.08 | .00     | 20.51   | 3.16 | .96 | 6.49 | 36                  | .00    | .00 | .00  | .00     | 19.79   | 2.06 | .91  | 5.45 | 0.140          |
| CpG 13      | 46                     | .00    | .00 | .00  | .00     | 2.15    | .26  | .09 | .63  | 35                  | .00    | .00 | .00  | .00     | 1.99    | .28  | .11  | .64  | 0.864          |
| CpG 14      | 12                     | .00    | .00 | .00  | .00     | .00     | .00  | .00 | .00  | 9                   | .00    | .00 | .00  | .00     | 2.66    | .30  | .30  | .89  | 0.702          |
| CpG 15      | 18                     | .00    | .00 | .00  | .00     | .00     | .00  | .00 | .00  | 10                  | .00    | .00 | .00  | .00     | .00     | .00  | .00  | .00  | 1.000          |
| CpG 16      | 23                     | .00    | .00 | .00  | .00     | 4.09    | .27  | .20 | .94  | 12                  | .00    | .00 | .00  | .00     | .00     | .00  | .00  | .00  | 0.694          |
| CpG 17      | 41                     | .00    | .00 | .00  | .00     | 3.48    | .20  | .12 | .74  | 29                  | .00    | .00 | .00  | .00     | 2.08    | .13  | .09  | .50  | 0.883          |
| CpG 18      | 42                     | .00    | .00 | .00  | .00     | 2.45    | .11  | .08 | .51  | 32                  | .00    | .00 | .00  | .00     | .00     | .00  | .00  | .00  | 0.214          |
| CpG 19      | 43                     | .00    | .00 | .00  | .00     | 14.76   | .58  | .38 | 2.51 | 33                  | .00    | .00 | .00  | .00     | 16.78   | 1.37 | .59  | 3.36 | 0.076          |
| CpG 20      | 43                     | .00    | .00 | .00  | .00     | .00     | .00  | .00 | .00  | 32                  | .00    | .00 | .00  | .00     | .00     | .00  | .00  | .00  | 1.000          |
| CpG 21      | 43                     | .00    | .00 | 1.34 | .00     | 9.70    | .82  | .29 | 1.93 | 33                  | .00    | .00 | 1.58 | .00     | 10.88   | 1.08 | .39  | 2.25 | 0.545          |
| CpG 22      | 33                     | .00    | .00 | .00  | .00     | 2.47    | .13  | .09 | .53  | 25                  | .00    | .00 | .00  | .00     | .00     | .00  | .00  | .00  | 0.214          |
| CpG 23      | 34                     | .00    | .00 | .00  | .00     | .00     | .00  | .00 | .00  | 28                  | .00    | .00 | .00  | .00     | .00     | .00  | .00  | .00  | 1.000          |
| CpG 24      | 34                     | .00    | .00 | .00  | .00     | 7.30    | .28  | .22 | 1.30 | 28                  | .00    | .00 | .00  | .00     | .00     | .00  | .00  | .00  | 0.196          |
| CpG 25      | 34                     | .00    | .00 | .00  | .00     | .00     | .00  | .00 | .00  | 28                  | .00    | .00 | .00  | .00     | .00     | .00  | .00  | .00  | 1.000          |
| CpG 26      | 35                     | .00    | .00 | .00  | .00     | .00     | .00  | .00 | .00  | 28                  | .00    | .00 | .00  | .00     | 2.51    | .09  | .09  | .47  | 0.264          |
| CpG 27      | 35                     | .00    | .00 | .00  | .00     | .00     | .00  | .00 | .00  | 29                  | .00    | .00 | .00  | .00     | 16.74   | .58  | .58  | 3.11 | 0.272          |
| CpG 28      | 35                     | .00    | .00 | .00  | .00     | .00     | .00  | .00 | .00  | 29                  | .00    | .00 | .00  | .00     | .00     | .00  | .00  | .00  | 1.000          |
| CpG 29      | 35                     | .00    | .00 | .00  | .00     | .00     | .00  | .00 | .00  | 29                  | .00    | .00 | .00  | .00     | 7.86    | .27  | .27  | 1.46 | 0.272          |
| CpG 30      | 40                     | .00    | .00 | .00  | .00     | 1.81    | .05  | .05 | .29  | 29                  | .00    | .00 | .00  | .00     | 2.34    | .15  | .10  | .56  | 0.362          |
| CpG 31      | 38                     | .00    | .00 | .00  | .00     | 2.10    | .06  | .06 | .34  | 24                  | .00    | .00 | .00  | .00     | 2.21    | .25  | .14  | .67  | 0.123          |
| CpG 32      | 13                     | .00    | .00 | .00  | .00     | .00     | .00  | .00 | .00  | 15                  | .00    | .00 | .00  | .00     | .00     | .00  | .00  | .00  | 1.000          |
| CpG 33§     | 44                     | .00    | .00 | .00  | .00     | .00     | .00  | .00 | .00  | 31                  | .00    | .00 | .00  | .00     | 3.19    | .27  | .15  | .85  | 0.036*         |
| CpG 34      | 43                     | .00    | .00 | .00  | .00     | .00     | .00  | .00 | .00  | 31                  | .00    | .00 | .00  | .00     | 2.23    | .14  | .09  | .53  | 0.094          |
| CpG 35      | 44                     | .00    | .00 | .00  | .00     | .00     | .00  | .00 | .00  | 31                  | .00    | .00 | .00  | .00     | .00     | .00  | .00  | .00  | 1.000          |
| CpG 36      | 44                     | .00    | .00 | .00  | .00     | 10.65   | .55  | .27 | 1.77 | 31                  | .00    | .00 | .00  | .00     | 3.11    | .30  | .15  | .81  | 0.720          |
| CpG 37      | 46                     | .00    | .00 | .00  | .00     | 4.02    | .21  | .12 | .81  | 32                  | .00    | .00 | .00  | .00     | 3.27    | .19  | .13  | .74  | 0.962          |
| CpG 38      | 45                     | 2.28   | .00 | 2.70 | .00     | 10.06   | 1.82 | .30 | 2.00 | 36                  | 2.56   | .00 | 3.49 | .00     | 7.34    | 2.28 | .38  | 2.28 | 0.203          |
| CpG 39      | 45                     | .00    | .00 | 2.11 | .00     | 9.06    | 1.24 | .29 | 1.95 | 36                  | .94    | .00 | 3.09 | .00     | 9.44    | 1.84 | .38  | 2.31 | 0.160          |
| CpG 40      | 34                     | .00    | .00 | .00  | .00     | 13.22   | .71  | .45 | 2.65 | 21                  | .00    | .00 | .00  | .00     | 8.84    | .98  | .58  | 2.66 | 0.522          |
| CpG 41      | 30                     | .00    | .00 | .00  | .00     | 1.62    | .05  | .05 | .30  | 22                  | .00    | .00 | .00  | .00     | .00     | .00  | .00  | .00  | 0.392          |
| CpG 42      | 35                     | 2.21   | .00 | 2.60 | .00     | 4.93    | 1.50 | .25 | 1.49 | 23                  | .00    | .00 | .00  | .00     | 30.36   | 1.97 | 1.33 | 6.36 | 0.089          |
| CpG 43      | 35                     | .00    | .00 | .00  | .00     | 2.35    | .07  | .07 | .40  | 23                  | .00    | .00 | .00  | .00     | 3.13    | .14  | .14  | .65  | 0.744          |
| CpG 44      | 37                     | .00    | .00 | .00  | .00     | .00     | .00  | .00 | .00  | 23                  | .00    | .00 | .00  | .00     | 2.77    | .22  | .15  | .72  | 0.070          |
| CpG 45      | 37                     | .00    | .00 | .00  | .00     | 5.65    | .53  | .19 | 1.17 | 24                  | .00    | .00 | .00  | .00     | 3.43    | .24  | .17  | .82  | 0.146          |
| CpG 46      | 39                     | .00    | .00 | .00  | .00     | 3.65    | .12  | .10 | .60  | 25                  | .00    | .00 | .00  | .00     | 3.92    | .29  | .20  | 1.01 | 0.623          |
| CpG 47      | 39                     | .00    | .00 | .00  | .00     | 2.97    | .33  | .11 | .68  | 26                  | .00    | .00 | .00  | .00     | 4.83    | .41  | .22  | 1.11 | 0.618          |
| Total meth. |                        | .00    | .00 | .00  | .00     | 20.51   | .36  | .04 | 1.64 |                     | .00    | .00 | .00  | .00     | 30.36   | .44  | .06  | 1.90 | 0.793          |

D5 – 5<sup>th</sup> day of life; SEM – Standard error of mean; SD – Standard deviation; Total meth. – total methylation; <sup>a</sup>Mann-Whitney U test; \*statistically significant difference between the groups; §percentage of methylation in preterm infants lower than in term infants.

# NR3C1 gene methylation and cortisol levels in preterm and healthy full-term infants in the first three months of life.

**Table S3.** Percentage of *NR3C1* gene methylation at **D30** - Exon 1F, CpG sites 8 to 47.

| Sites       | PRETERM INFANTS (n=42) |        |     |      |         |         |      |     |      | TERM INFANTS (n=35) |        |     |      |         |         |      |      |      | P <sup>a</sup> |
|-------------|------------------------|--------|-----|------|---------|---------|------|-----|------|---------------------|--------|-----|------|---------|---------|------|------|------|----------------|
|             | No.                    | Median | P25 | P75  | Minimum | Maximum | Mean | SEM | SD   | No.                 | Median | P25 | P75  | Minimum | Maximum | Mean | SEM  | SD   |                |
| CpG 8       | 41                     | .00    | .00 | .00  | .00     | .00     | .00  | .00 | .00  | 30                  | .00    | .00 | .00  | .00     | .00     | .00  | .00  | .00  | 1.000          |
| CpG 9       | 41                     | .00    | .00 | .00  | .00     | .00     | .00  | .00 | .00  | 30                  | .00    | .00 | .00  | .00     | 1.86    | .06  | .06  | .34  | 0.242          |
| CpG 10      | 41                     | .00    | .00 | .00  | .00     | .00     | .00  | .00 | .00  | 30                  | .00    | .00 | .00  | .00     | .00     | .00  | .00  | .00  | 1.000          |
| CpG 11      | 41                     | .00    | .00 | .00  | .00     | .00     | .00  | .00 | .00  | 30                  | .00    | .00 | .00  | .00     | 2.26    | .08  | .08  | .41  | 0.242          |
| CpG 12      | 41                     | .00    | .00 | 2.16 | .00     | 17.24   | 2.75 | .77 | 4.94 | 30                  | .00    | .00 | 2.89 | .00     | 19.53   | 2.96 | 1.11 | 6.07 | 0.468          |
| CpG 13      | 41                     | .00    | .00 | .00  | .00     | 2.60    | .27  | .11 | .68  | 30                  | .00    | .00 | 1.77 | .00     | 10.24   | 1.33 | .49  | 2.70 | 0.074          |
| CpG 14      | 13                     | .00    | .00 | .00  | .00     | .00     | .00  | .00 | .00  | 25                  | .00    | .00 | .00  | .00     | .00     | .00  | .00  | .00  | 1.000          |
| CpG 15      | 17                     | .00    | .00 | .00  | .00     | .00     | .00  | .00 | .00  | 26                  | .00    | .00 | .00  | .00     | .00     | .00  | .00  | .00  | 1.000          |
| CpG 16      | 23                     | .00    | .00 | .00  | .00     | .00     | .00  | .00 | .00  | 26                  | .00    | .00 | .00  | .00     | 5.52    | .32  | .23  | 1.19 | 0.179          |
| CpG 17      | 35                     | .00    | .00 | .00  | .00     | .00     | .00  | .00 | .00  | 31                  | .00    | .00 | .00  | .00     | .00     | .00  | .00  | .00  | 1.000          |
| CpG 18      | 35                     | .00    | .00 | .00  | .00     | .00     | .00  | .00 | .00  | 31                  | .00    | .00 | .00  | .00     | .00     | .00  | .00  | .00  | 1.000          |
| CpG 19      | 35                     | .00    | .00 | .00  | .00     | 6.19    | .35  | .24 | 1.43 | 31                  | .00    | .00 | .00  | .00     | 9.97    | 1.32 | .53  | 2.97 | 0.085          |
| CpG 20      | 36                     | .00    | .00 | .00  | .00     | .00     | .00  | .00 | .00  | 31                  | .00    | .00 | .00  | .00     | .00     | .00  | .00  | .00  | 1.000          |
| CpG 21§     | 36                     | .00    | .00 | .00  | .00     | 6.70    | .54  | .25 | 1.47 | 31                  | .00    | .00 | 6.92 | .00     | 9.86    | 2.94 | .67  | 3.72 | <b>0.003*</b>  |
| CpG 22      | 34                     | .00    | .00 | .00  | .00     | 2.12    | .11  | .08 | .46  | 12                  | .00    | .00 | .00  | .00     | .00     | .00  | .00  | .00  | 0.396          |
| CpG 23      | 34                     | .00    | .00 | .00  | .00     | .00     | .00  | .00 | .00  | 12                  | .00    | .00 | .00  | .00     | .00     | .00  | .00  | .00  | 1.000          |
| CpG 24      | 34                     | .00    | .00 | .00  | .00     | .00     | .00  | .00 | .00  | 11                  | .00    | .00 | .00  | .00     | .00     | .00  | .00  | .00  | 1.000          |
| CpG 25      | 32                     | .00    | .00 | .00  | .00     | .00     | .00  | .00 | .00  | 12                  | .00    | .00 | .00  | .00     | .00     | .00  | .00  | .00  | 1.000          |
| CpG 26      | 34                     | .00    | .00 | .00  | .00     | .00     | .00  | .00 | .00  | 12                  | .00    | .00 | .00  | .00     | .00     | .00  | .00  | .00  | 1.000          |
| CpG 27      | 34                     | .00    | .00 | .00  | .00     | .00     | .00  | .00 | .00  | 12                  | .00    | .00 | .00  | .00     | .00     | .00  | .00  | .00  | 1.000          |
| CpG 28      | 34                     | .00    | .00 | .00  | .00     | 1.60    | .21  | .09 | .52  | 15                  | .00    | .00 | .00  | .00     | .00     | .00  | .00  | .00  | 0.122          |
| CpG 29      | 34                     | .00    | .00 | .00  | .00     | .00     | .00  | .00 | .00  | 17                  | .00    | .00 | .00  | .00     | 10.01   | .59  | .59  | 2.43 | 0.157          |
| CpG 30      | 39                     | .00    | .00 | .00  | .00     | .00     | .00  | .00 | .00  | 9                   | .00    | .00 | .00  | .00     | .00     | .00  | .00  | .00  | 1.000          |
| CpG 31      | 33                     | .00    | .00 | .00  | .00     | .00     | .00  | .00 | .00  | 9                   | .00    | .00 | .00  | .00     | .00     | .00  | .00  | .00  | 1.000          |
| CpG 32      | 7                      | .00    | .00 | .00  | .00     | 1.77    | .25  | .25 | .67  | 9                   | .00    | .00 | .00  | .00     | 2.87    | .32  | .32  | .96  | 1.000          |
| CpG 33      | 41                     | .00    | .00 | .00  | .00     | .00     | .00  | .00 | .00  | 13                  | .00    | .00 | .00  | .00     | .00     | .00  | .00  | .00  | 1.000          |
| CpG 34      | 41                     | .00    | .00 | .00  | .00     | .00     | .00  | .00 | .00  | 13                  | .00    | .00 | .00  | .00     | .00     | .00  | .00  | .00  | 1.000          |
| CpG 35      | 41                     | .00    | .00 | .00  | .00     | .00     | .00  | .00 | .00  | 16                  | .00    | .00 | .00  | .00     | .00     | .00  | .00  | .00  | 1.000          |
| CpG 36§     | 41                     | .00    | .00 | .00  | .00     | 4.24    | .24  | .14 | .89  | 17                  | .00    | .00 | 6.36 | .00     | 16.87   | 3.78 | 1.46 | 6.01 | <b>0.004*</b>  |
| CpG 37§     | 39                     | .00    | .00 | .00  | .00     | 2.42    | .06  | .06 | .39  | 28                  | .00    | .00 | .00  | .00     | 18.88   | 1.50 | .77  | 4.05 | <b>0.013*</b>  |
| CpG 38§     | 40                     | 2.38   | .00 | 2.84 | .00     | 6.45    | 1.70 | .27 | 1.72 | 18                  | 3.71   | .00 | 5.67 | .00     | 13.33   | 3.70 | .93  | 3.96 | <b>0.030*</b>  |
| CpG 39      | 41                     | .00    | .00 | 2.43 | .00     | 3.83    | 1.12 | .22 | 1.40 | 26                  | .00    | .00 | .00  | .00     | 12.59   | 1.52 | .68  | 3.46 | 0.335          |
| CpG 40      | 27                     | .00    | .00 | .00  | .00     | 2.49    | .31  | .15 | .77  | 22                  | .00    | .00 | .00  | .00     | .00     | .00  | .00  | .00  | 0.063          |
| CpG 41      | 23                     | .00    | .00 | .00  | .00     | .00     | .00  | .00 | .00  | 25                  | .00    | .00 | .00  | .00     | .00     | .00  | .00  | .00  | 1.000          |
| CpG 42#     | 27                     | .00    | .00 | 2.46 | .00     | 3.33    | 1.13 | .25 | 1.32 | 25                  | .00    | .00 | .00  | .00     | 2.80    | .11  | .11  | .56  | <b>0.001*</b>  |
| CpG 43      | 25                     | .00    | .00 | .00  | .00     | 1.19    | .09  | .06 | .32  | 26                  | .00    | .00 | .00  | .00     | .00     | .00  | .00  | .00  | 0.145          |
| CpG 44      | 27                     | .00    | .00 | .00  | .00     | .89     | .03  | .03 | .17  | 26                  | .00    | .00 | .00  | .00     | .00     | .00  | .00  | .00  | 0.326          |
| CpG 45#     | 27                     | .00    | .00 | .00  | .00     | 2.48    | .25  | .12 | .64  | 26                  | .00    | .00 | .00  | .00     | .00     | .00  | .00  | .00  | <b>0.043*</b>  |
| CpG 46      | 29                     | .00    | .00 | .00  | .00     | .00     | .00  | .00 | .00  | 27                  | .00    | .00 | .00  | .00     | .00     | .00  | .00  | .00  | 1.000          |
| CpG 47§     | 29                     | .00    | .00 | .94  | .00     | 2.54    | .42  | .13 | .70  | 27                  | .00    | .00 | .00  | .00     | 9.94    | .46  | .38  | 1.95 | <b>0.046*</b>  |
| Total meth. |                        | .00    | .00 | .00  | .00     | 17.24   | 0.27 | .03 | 1.21 |                     | .00    | .00 | .00  | .00     | 19.53   | .59  | .08  | 2.33 | 0.760          |

D30 – 30<sup>th</sup> day of life; SEM – Standard error of mean; SD – Standard deviation; Total meth. – total methylation; <sup>a</sup>Mann-Whitney U test; \*statistically significant difference between the groups; #percentage of methylation in preterm infants higher than in term infants; §percentage of methylation in preterm infants lower than in term infants.

# NR3C1 gene methylation and cortisol levels in preterm and healthy full-term infants in the first three months of life.

**Table S4.** Percentage of NR3C1 gene methylation at the **Day of discharge for preterm and D90 for term newborns** - Exon 1F, CpG sites 8 to 47.

| Sites       | PRETERM INFANTS (n=34) |        |     |      |         |         |      |     |      | TERM INFANTS (n=35) |        |     |      |         |         |      |      |      | P <sup>a</sup> |
|-------------|------------------------|--------|-----|------|---------|---------|------|-----|------|---------------------|--------|-----|------|---------|---------|------|------|------|----------------|
|             | No.                    | Median | P25 | P75  | Minimum | Maximum | Mean | SEM | SD   | No.                 | Median | P25 | P75  | Minimum | Maximum | Mean | SEM  | SD   |                |
| CpG 8       | 32                     | .00    | .00 | .00  | .00     | .00     | .00  | .00 | .00  | 29                  | .00    | .00 | .00  | .00     | 4.87    | .17  | .17  | .90  | 0.294          |
| CpG 9       | 32                     | .00    | .00 | .00  | .00     | .00     | .00  | .00 | .00  | 29                  | .00    | .00 | .00  | .00     | 4.14    | .24  | .17  | .91  | 0.134          |
| CpG 10      | 32                     | .00    | .00 | .00  | .00     | .00     | .00  | .00 | .00  | 29                  | .00    | .00 | .00  | .00     | 3.44    | .23  | .16  | .87  | 0.134          |
| CpG 11      | 32                     | .00    | .00 | .00  | .00     | .00     | .00  | .00 | .00  | 29                  | .00    | .00 | .00  | .00     | 3.34    | .12  | .12  | .62  | 0.294          |
| CpG 12      | 32                     | .00    | .00 | 1.98 | .00     | 3.11    | .77  | .20 | 1.11 | 30                  | .00    | .00 | 3.15 | .00     | 19.65   | 3.23 | 1.12 | 6.16 | 0.180          |
| CpG 13      | 32                     | .00    | .00 | .74  | .00     | 2.36    | .46  | .15 | .83  | 30                  | .00    | .00 | .00  | .00     | 14.65   | .99  | .51  | 2.78 | 0.800          |
| CpG 14      | 11                     | .00    | .00 | .00  | .00     | 1.65    | .15  | .15 | .50  | 30                  | .00    | .00 | .00  | .00     | 2.63    | .09  | .09  | .48  | 0.805          |
| CpG 15      | 14                     | .00    | .00 | .00  | .00     | .00     | .00  | .00 | .00  | 31                  | .00    | .00 | .00  | .00     | 2.73    | .09  | .09  | .49  | 0.502          |
| CpG 16      | 16                     | .00    | .00 | .00  | .00     | .00     | .00  | .00 | .00  | 31                  | .00    | .00 | .00  | .00     | 2.37    | .08  | .08  | .43  | 0.472          |
| CpG 17      | 32                     | .00    | .00 | .00  | .00     | 2.14    | .12  | .09 | .48  | 31                  | .00    | .00 | .00  | .00     | 2.96    | .17  | .12  | .66  | 0.922          |
| CpG 18      | 32                     | .00    | .00 | .00  | .00     | 2.97    | .18  | .13 | .71  | 31                  | .00    | .00 | .00  | .00     | .00     | .00  | .00  | .00  | 0.161          |
| CpG 19      | 33                     | .00    | .00 | .00  | .00     | 1.65    | .08  | .06 | .34  | 31                  | .00    | .00 | .00  | .00     | 16.70   | .79  | .56  | 3.11 | 0.535          |
| CpG 20      | 33                     | .00    | .00 | .00  | .00     | .00     | .00  | .00 | .00  | 31                  | .00    | .00 | .00  | .00     | .00     | .00  | .00  | .00  | 1.000          |
| CpG 21§     | 33                     | .00    | .00 | .00  | .00     | 4.24    | .59  | .20 | 1.16 | 31                  | 2.34   | .00 | 4.59 | .00     | 15.20   | 2.93 | .71  | 3.97 | 0.004*         |
| CpG 22      | 29                     | .00    | .00 | .00  | .00     | 2.23    | .27  | .13 | .70  | 18                  | .00    | .00 | .00  | .00     | .00     | .00  | .00  | .00  | 0.104          |
| CpG 23      | 28                     | .00    | .00 | .00  | .00     | 2.15    | .08  | .08 | .41  | 19                  | .00    | .00 | .00  | .00     | .00     | .00  | .00  | .00  | 0.410          |
| CpG 24      | 29                     | .00    | .00 | .00  | .00     | 3.15    | .28  | .16 | .84  | 19                  | .00    | .00 | .00  | .00     | .00     | .00  | .00  | .00  | 0.152          |
| CpG 25      | 29                     | .00    | .00 | .00  | .00     | .00     | .00  | .00 | .00  | 19                  | .00    | .00 | .00  | .00     | .00     | .00  | .00  | .00  | 1.000          |
| CpG 26      | 29                     | .00    | .00 | .00  | .00     | .00     | .00  | .00 | .00  | 20                  | .00    | .00 | .00  | .00     | .00     | .00  | .00  | .00  | 1.000          |
| CpG 27      | 29                     | .00    | .00 | .00  | .00     | .00     | .00  | .00 | .00  | 21                  | .00    | .00 | .00  | .00     | .00     | .00  | .00  | .00  | 1.000          |
| CpG 28      | 29                     | .00    | .00 | .00  | .00     | 1.42    | .05  | .05 | .26  | 22                  | .00    | .00 | .00  | .00     | .00     | .00  | .00  | .00  | 0.384          |
| CpG 29      | 29                     | .00    | .00 | .00  | .00     | .00     | .00  | .00 | .00  | 22                  | .00    | .00 | .00  | .00     | 10.82   | .49  | .49  | 2.31 | 0.251          |
| CpG 30      | 28                     | .00    | .00 | .00  | .00     | .00     | .00  | .00 | .00  | 14                  | .00    | .00 | .00  | .00     | .00     | .00  | .00  | .00  | 1.000          |
| CpG 31      | 25                     | .00    | .00 | .00  | .00     | .00     | .00  | .00 | .00  | 14                  | .00    | .00 | .00  | .00     | .00     | .00  | .00  | .00  | 1.000          |
| CpG 32      | 2                      | .00    | .00 | .00  | .00     | .00     | .00  | .00 | .00  | 14                  | .00    | .00 | .00  | .00     | .00     | .00  | .00  | .00  | 1.000          |
| CpG 33      | 31                     | .00    | .00 | .00  | .00     | 2.55    | .08  | .08 | .46  | 14                  | .00    | .00 | .00  | .00     | .00     | .00  | .00  | .00  | 0.502          |
| CpG 34      | 31                     | .00    | .00 | .00  | .00     | .00     | .00  | .00 | .00  | 14                  | .00    | .00 | .00  | .00     | 4.00    | .29  | .29  | 1.07 | 0.137          |
| CpG 35      | 31                     | .00    | .00 | .00  | .00     | .00     | .00  | .00 | .00  | 15                  | .00    | .00 | .00  | .00     | .00     | .00  | .00  | .00  | 1.000          |
| CpG 36§     | 31                     | .00    | .00 | .00  | .00     | 3.02    | .25  | .14 | .80  | 15                  | .00    | .00 | 3.77 | .00     | 6.16    | 1.83 | .64  | 2.47 | 0.008*         |
| CpG 37      | 34                     | .00    | .00 | .00  | .00     | 2.72    | .11  | .08 | .49  | 25                  | .00    | .00 | .00  | .00     | 19.30   | 1.23 | .81  | 4.05 | 0.188          |
| CpG 38      | 34                     | 2.59   | .00 | 3.01 | .00     | 28.72   | 2.83 | .82 | 4.76 | 18                  | 4.25   | .00 | 5.45 | .00     | 10.63   | 4.02 | .88  | 3.72 | 0.059          |
| CpG 39      | 34                     | .00    | .00 | 2.20 | .00     | 3.98    | 1.14 | .22 | 1.31 | 21                  | .00    | .00 | .00  | .00     | 5.19    | .76  | .33  | 1.51 | 0.194          |
| CpG 40      | 30                     | .00    | .00 | .00  | .00     | 3.02    | .24  | .13 | .74  | 23                  | .00    | .00 | .00  | .00     | .00     | .00  | .00  | .00  | 0.122          |
| CpG 41      | 25                     | .00    | .00 | .00  | .00     | .00     | .00  | .00 | .00  | 23                  | .00    | .00 | .00  | .00     | .00     | .00  | .00  | .00  | 1.000          |
| CpG 42#     | 33                     | 2.03   | .00 | 2.56 | .00     | 4.76    | 1.44 | .25 | 1.42 | 20                  | .00    | .00 | .00  | .00     | 2.22    | .31  | .17  | .75  | 0.002*         |
| CpG 43      | 32                     | .00    | .00 | .00  | .00     | .99     | .03  | .03 | .18  | 20                  | .00    | .00 | .00  | .00     | .00     | .00  | .00  | .00  | 0.429          |
| CpG 44      | 33                     | .00    | .00 | .00  | .00     | .89     | .03  | .03 | .15  | 20                  | .00    | .00 | .00  | .00     | .00     | .00  | .00  | .00  | 0.436          |
| CpG 45      | 33                     | .00    | .00 | .00  | .00     | 1.73    | .17  | .08 | .48  | 20                  | .00    | .00 | .00  | .00     | 1.55    | .08  | .08  | .35  | 0.416          |
| CpG 46      | 33                     | .00    | .00 | .00  | .00     | 1.45    | .04  | .04 | .25  | 20                  | .00    | .00 | .00  | .00     | .00     | .00  | .00  | .00  | 0.436          |
| CpG 47      | 33                     | .00    | .00 | 1.11 | .00     | 2.11    | .45  | .12 | .67  | 20                  | .00    | .00 | .00  | .00     | 7.24    | .94  | .49  | 2.17 | 0.595          |
| Total meth. |                        | .00    | .00 | .00  | .00     | 28.72   | .28  | .03 | 1.12 |                     | .00    | .00 | .00  | .00     | 19.65   | .51  | .07  | 2.09 | 0.450          |

D90 – 90th day of life; SEM – Standard error of mean; SD – Standard deviation; Total meth. – total methylation; <sup>a</sup>Mann-Whitney U test; \*statistically significant difference between the groups.  
#percentage of methylation in preterm infants higher than in term infants; §percentage of methylation in preterm infants lower than in term infants.
