# Supplementary material
Source: publisher figshare collection journal article supplement (https://future-science-group.figshare.com/articles/dataset/_/22200145)
Supplement: Supplementary file 5 [file 1]

**NR3C1 gene methylation and cortisol levels in preterm and healthy full-term infants in the first three months of life.**

**Table S6** – Crude means and estimated changes in the percentage of methylation on days 0, 5, 30 and D\* (day of discharge for preterm infants or D90 for term infants) in both groups.

| CpG sites | Day | Term newborns |                     | Preterm newborns |                     | Preterm compared to term infants |                   |               |         |
|-----------|-----|---------------|---------------------|------------------|---------------------|----------------------------------|-------------------|---------------|---------|
|           |     | Mean (SD)     | Change <sup>a</sup> | Mean (SD)        | Change <sup>a</sup> | beta                             | e <sup>beta</sup> | 95%CI         | p-value |
| CpG8      | D0  | 0.04 (0.31)   | -                   | 0.00 (0.00)      | -                   |                                  |                   |               |         |
|           | D5  | 0.00 (0.00)   | 0.0033              | 0.00 (0.00)      | 0                   | -0.020                           | 0.980             | 0.9355; 1.027 | 0.3996  |
|           | D30 | 0.00 (0.00)   | 0.0255              | 0.00 (0.00)      | 0                   |                                  |                   |               |         |
|           | D*  | 0.17 (0.90)   | 0.0938              | 0.00 (0.00)      | 0                   |                                  |                   |               |         |
| CpG9      | D0  | 0.00 (0.00)   | -                   | 0.05 (0.33)      | -                   |                                  |                   |               |         |
|           | D5  | 0.00 (0.00)   | 0.0029              | 0.00 (0.00)      | -0.0032             | -0.070                           | 0.932             | 0.904; 0.962  | <0.0001 |
|           | D30 | 0.06 (0.34)   | 0.0354              | 0.00 (0.00)      | -0.0149             |                                  |                   |               |         |
|           | D*  | 0.24 (0.91)   | 0.3135              | 0.00 (0.00)      | -0.0246             |                                  |                   |               |         |
| CpG10     | D0  | 0.00 (0.00)   | -                   | 0.00 (0.00)      | -                   |                                  |                   |               |         |
|           | D5  | 0.00 (0.00)   | 0.0020              | 0.00 (0.00)      | 0                   | -0.045                           | 0.956             | 0.934; 0.978  | 0.0001  |
|           | D30 | 0.00 (0.00)   | 0.0231              | 0.00 (0.00)      | 0                   |                                  |                   |               |         |
|           | D*  | 0.23 (0.87)   | 0.1773              | 0.00 (0.00)      | 0                   |                                  |                   |               |         |
| CpG11     | D0  | 0.05 (0.36)   | -                   | 0.03 (0.22)      | -                   |                                  |                   |               |         |
|           | D5  | 0.00 (0.00)   | 0.0000              | 0.00 (0.00)      | -0.0019             | -0.032                           | 0.968             | 0.929; 1.009  | 0.128   |
|           | D30 | 0.08 (0.41)   | 0.0263              | 0.00 (0.00)      | -0.0019             |                                  |                   |               |         |
|           | D*  | 0.12 (0.62)   | 0.0871              | 0.00 (0.00)      | -0.0019             |                                  |                   |               |         |
| CpG12     | D0  | 2.71 (6.11)   | -                   | 3.87 (6.10)      | -                   |                                  |                   |               |         |
|           | D5  | 2.06 (5.45)   | 0.0513              | 3.16 (6.49)      | -0.2520             | -0.018                           | 0.982             | 0.963; 1.001  | 0.067   |
|           | D30 | 2.96 (6.07)   | 0.3240              | 2.75 (4.94)      | -1.2803             |                                  |                   |               |         |
|           | D*  | 3.23 (6.16)   | 0.8164              | 0.77 (1.11)      | -2.3265             |                                  |                   |               |         |
| CpG13     | D0  | 0.33 (0.70)   | -                   | 0.37 (0.70)      | -                   |                                  |                   |               |         |
|           | D5  | 0.28 (0.64)   | 0.0409              | 0.26 (0.63)      | 0.0070              | -0.016                           | 0.984             | 0.968; 1.001  | 0.060   |
|           | D30 | 1.33 (2.70)   | 0.3221              | 0.27 (0.68)      | 0.0446              |                                  |                   |               |         |
|           | D*  | 0.99 (2.78)   | 1.1964              | 0.46 (0.83)      | 0.1134              |                                  |                   |               |         |
| CpG14     | D0  | 0.42 (1.46)   | -                   | 0.56 (1.45)      | -                   |                                  |                   |               |         |
|           | D5  | 0.30 (0.89)   | -0.0156             | 0.00 (0.00)      | -0.0099             | 0.005                            | 1.005             | 0.940; 1.075  | 0.885   |
|           | D30 | 0.00 (0.00)   | -0.0789             | 0.00 (0.00)      | -0.0532             |                                  |                   |               |         |
|           | D*  | 0.09 (0.48)   | -0.1424             | 0.15 (0.50)      | -0.1039             |                                  |                   |               |         |
| CpG15     | D0  | 0.09 (0.48)   | -                   | 0.46 (1.36)      | -                   |                                  |                   |               |         |
|           | D5  | 0.00 (0.00)   | -0.0144             | 0.00 (0.00)      | -0.0398             | -0.033                           | 0.967             | 0.915; 1.023  | 0.242   |
|           | D30 | 0.00 (0.00)   | -0.0722             | 0.00 (0.00)      | -0.1425             |                                  |                   |               |         |
|           | D*  | 0.09 (0.49)   | -0.1292             | 0.00 (0.00)      | -0.1801             |                                  |                   |               |         |
| CpG16     | D0  | 0.74 (1.67)   | -                   | 1.06 (2.12)      | -                   |                                  |                   |               |         |
|           | D5  | 0.00 (0.00)   | -0.0818             | 0.27 (0.94)      | -0.1534             | -0.036                           | 0.964             | 0.933; 0.997  | 0.033   |
|           | D30 | 0.32 (1.19)   | -0.3569             | 0.00 (0.00)      | -0.4775             |                                  |                   |               |         |
|           | D*  | 0.08 (0.43)   | -0.5398             | 0.00 (0.00)      | -0.5526             |                                  |                   |               |         |
| CpG17     | D0  | 1.09 (2.74)   | -                   | 0.62 (1.79)      | -                   |                                  |                   |               |         |
|           | D5  | 0.13 (0.50)   | -0.0628             | 0.20 (0.74)      | -0.0331             | 0.003                            | 1.003             | 0.961; 1.046  | 0.901   |
|           | D30 | 0.00 (0.00)   | -0.2911             | 0.00 (0.00)      | -0.1579             |                                  |                   |               |         |
|           | D*  | 0.17 (0.66)   | -0.4717             | 0.12 (0.48)      | -0.2651             |                                  |                   |               |         |
| CpG18     | D0  | 0.26 (1.40)   | -                   | 0.47 (1.53)      | -                   |                                  |                   |               |         |
|           | D5  | 0.00 (0.00)   | -0.0281             | 0.11 (0.51)      | -0.0117             | 0.034                            | 1.034             | 0.990; 1.080  | 0.129   |
|           | D30 | 0.00 (0.00)   | -0.1050             | 0.00 (0.00)      | -0.0627             |                                  |                   |               |         |
|           | D*  | 0.00 (0.00)   | -0.1374             | 0.18 (0.71)      | -0.1220             |                                  |                   |               |         |
| CpG19     | D0  | 1.31 (3.13)   | -                   | 1.19 (2.47)      | -                   |                                  |                   |               |         |
|           | D5  | 1.37 (3.36)   | -0.0376             | 0.58 (2.51)      | -0.1495             | -0.028                           | 0.972             | 0.947; 0.998  | 0.035   |
|           | D30 | 1.32 (2.97)   | -0.2102             | 0.35 (1.43)      | -0.6104             |                                  |                   |               |         |
|           | D*  | 0.79 (3.11)   | -0.4371             | 0.08 (0.34)      | -0.8634             |                                  |                   |               |         |
| CpG20     | D0  | 0.06 (0.39)   | -                   | 0.00 (0.00)      | -                   |                                  |                   |               |         |
|           | D5  | 0.00 (0.00)   | -0.0046             | 0.00 (0.00)      | 0                   |                                  |                   |               |         |
|           | D30 | 0.00 (0.00)   | -0.0211             | 0.00 (0.00)      | 0                   |                                  |                   |               |         |
|           | Dd* | 0.00 (0.00)   | -0.0334             | 0.00 (0.00)      | 0                   |                                  |                   |               |         |

<sup>a</sup>Change compared to D0 (day 0).

**Table S6 (cont.)** – Crude means and estimated changes in the percentage of methylation on days 0, 5, 30 and D\* (day of discharge for preterm infants or D90 for term infants) in both groups.

| CpG sites | Day | Term newborns |                     | Preterm newborns |                     | Preterm compared to term infants |                   |              |                  |
|-----------|-----|---------------|---------------------|------------------|---------------------|----------------------------------|-------------------|--------------|------------------|
|           |     | Mean (SD)     | Change <sup>a</sup> | Mean (SD)        | Change <sup>a</sup> | beta                             | e <sup>beta</sup> | 95%CI        | p-value          |
| CpG21     | D0  | 0.76 (2.16)   | -                   | 0.64 (1.54)      | -                   | -0.030                           | 0.970             | 0.955; 0.987 | <b>0.0003</b>    |
|           | D5  | 1.08 (2.25)   | 0.1085              | 0.82 (1.93)      | -0,0276             |                                  |                   |              |                  |
|           | D30 | 2.94 (3.72)   | 0.8720              | 0.54 (1.47)      | -0,1502             |                                  |                   |              |                  |
|           | D*  | 2.93 (3.97)   | 3.3684              | 0.59 (1.16)      | -0,3001             |                                  |                   |              |                  |
| CpG22     | D0  | 0.10 (0.54)   | -                   | 0.50 (1.37)      | -                   | 0.025                            | 1.026             | 0.987; 1.066 | 0.199            |
|           | D5  | 0.00 (0.00)   | -0.0084             | 0.13 (0.53)      | -0,0057             |                                  |                   |              |                  |
|           | D30 | 0.00 (0.00)   | -0.0360             | 0.11 (0.46)      | -0,0326             |                                  |                   |              |                  |
|           | D*  | 0.00 (0.00)   | -0.0535             | 0.27 (0.70)      | -0,0699             |                                  |                   |              |                  |
| CpG23     | D0  | 0.00 (0.00)   | -                   | 0.09 (0.52)      | -                   | 0.005                            | 0.024             | 0.958; 1.053 | 0.852            |
|           | D5  | 0.00 (0.00)   | 0                   | 0.00 (0.00)      | 0,0010              |                                  |                   |              |                  |
|           | D30 | 0.00 (0.00)   | 0                   | 0.00 (0.00)      | 0,0066              |                                  |                   |              |                  |
|           | D*  | 0.00 (0.00)   | 0                   | 0.08 (0,41)      | 0,0168              |                                  |                   |              |                  |
| CpG24     | D0  | 0.30 (0.96)   | -                   | 0.57 (1.47)      | -                   | 0.035                            | 1.036             | 1.001; 1.072 | <b>0.044</b>     |
|           | D5  | 0.00 (0.00)   | -0.0304             | 0.28 (1.30)      | -0,0125             |                                  |                   |              |                  |
|           | D30 | 0.00 (0.00)   | -0.1142             | 0.00 (0.00)      | -0,0684             |                                  |                   |              |                  |
|           | D*  | 0.00 (0.00)   | -0.1501             | 0.28 (0.84)      | -0,1382             |                                  |                   |              |                  |
| CpG25     | D0  | 0.00 (0.00)   | -                   | 0.00 (0.00)      | -                   | -                                | -                 | -            | -                |
|           | D5  | 0.00 (0.00)   | -                   | 0.00 (0.00)      | -                   |                                  |                   |              |                  |
|           | D30 | 0.00 (0.00)   | -                   | 0.00 (0.00)      | -                   |                                  |                   |              |                  |
|           | D*  | 0.00 (0.00)   | -                   | 0.00 (0.00)      | -                   |                                  |                   |              |                  |
| CpG26     | D0  | 0.00 (0.00)   | -                   | 0.09 (0.53)      | -                   | -0.003                           | 0.997             | 0.959; 1.037 | 0.893            |
|           | D5  | 0.09 (0.47)   | -0.0063             | 0.00 (0.00)      | -0,0064             |                                  |                   |              |                  |
|           | D30 | 0.00 (0.00)   | -0.0282             | 0.00 (0.00)      | -0,0280             |                                  |                   |              |                  |
|           | D*  | 0.00 (0.00)   | -0.0442             | 0.00 (0.00)      | -0,0425             |                                  |                   |              |                  |
| CpG27     | D0  | 0.00 (0.00)   | -                   | 0.00 (0.00)      | -                   | 0.051                            | 1.052             | 1.023; 1.083 | <b>0.0005</b>    |
|           | D5  | 0.58 (3.11)   | -0.0724             | 0.00 (0.00)      | 0                   |                                  |                   |              |                  |
|           | D30 | 0.00 (0.00)   | -0.2517             | 0.00 (0.00)      | 0                   |                                  |                   |              |                  |
|           | D*  | 0.00 (0.00)   | -0.3118             | 0.00 (0.00)      | 0                   |                                  |                   |              |                  |
| CpG28     | D0  | 0.00 (0.00)   | -                   | 0.00 (0.00)      | -                   | 0.068                            | 1.070             | 1.062; 1.079 | <b>&lt;.0001</b> |
|           | D5  | 0.00 (0.00)   | 0                   | 0.00 (0.00)      | 0,0054              |                                  |                   |              |                  |
|           | D30 | 0.00 (0.00)   | 0                   | 0.21 (0.52)      | 0,0888              |                                  |                   |              |                  |
|           | D*  | 0.00 (0.00)   | 0                   | 0.05 (0.26)      | 1,4775              |                                  |                   |              |                  |
| CpG29     | D0  | 0.30 (1.74)   | -                   | 0.00 (0.00)      | -                   | -0.010                           | 0.990             | 0.961; 1.019 | 0.492            |
|           | D5  | 0.27 (1.46)   | 0.0164              | 0.00 (0.00)      | 0                   |                                  |                   |              |                  |
|           | D30 | 0.59 (2.43)   | 0.1122              | 0.00 (0.00)      | 0                   |                                  |                   |              |                  |
|           | D*  | 0.49 (2.31)   | 0.3238              | 0.00 (0.00)      | 0                   |                                  |                   |              |                  |
| CpG30     | D0  | 0.19 (0.75)   | -                   | 0.18 (0.79)      | -                   | 0.005                            | 1.005             | 0.975; 1.036 | 0.736            |
|           | D5  | 0.15 (0.56)   | -0.0378             | 0.05 (0.29)      | -0,0195             |                                  |                   |              |                  |
|           | D30 | 0.00 (0.00)   | -0.1389             | 0.00 (0.00)      | -0,0754             |                                  |                   |              |                  |
|           | D*  | 0.00 (0.00)   | -0.1793             | 0.00 (0.00)      | -0,1015             |                                  |                   |              |                  |
| CpG31     | D0  | 0.31 (1.05)   | -                   | 0.29 (0.94)      | -                   | 0.007                            | 1.007             | 0.980; 1.035 | 0.607            |
|           | D5  | 0.25 (0.67)   | -0.0680             | 0.06 (0.34)      | -0,0301             |                                  |                   |              |                  |
|           | D30 | 0.00 (0.00)   | -0.2351             | 0.00 (0.00)      | -0,1110             |                                  |                   |              |                  |
|           | D*  | 0.00 (0.00)   | -0.2901             | 0.00 (0.00)      | -0,1437             |                                  |                   |              |                  |
| CpG32     | D0  | 0.00 (0.00)   | -                   | 0.00 (0.00)      | -                   | 0.037                            | 1.038             | 0.995; 1.083 | 0.085            |
|           | D5  | 0.00 (0.00)   | 0.0055              | 0.00 (0.00)      | 0,0053              |                                  |                   |              |                  |
|           | D30 | 0.32 (0.96)   | 0.0714              | 0.25 (0.67)      | 0,1321              |                                  |                   |              |                  |
|           | D*  | 0.00 (0.00)   | 0.7305              | 0.00 (0.00)      | 5,1636              |                                  |                   |              |                  |
| CpG33     | D0  | 0.22 (0.90)   | -                   | 0.20 (0.91)      | -                   | 0.048                            | 1.049             | 1.005; 1.094 | <b>0.028</b>     |
|           | D5  | 0.27 (0.85)   | -0.0605             | 0.00 (0.00)      | -0,0018             |                                  |                   |              |                  |
|           | D30 | 0.00 (0.00)   | -0.2097             | 0.00 (0.00)      | -0,0103             |                                  |                   |              |                  |
|           | D*  | 0.00 (0.00)   | -0.2592             | 0.08 (0.46)      | -0,0220             |                                  |                   |              |                  |

<sup>a</sup>Change compared to D0 (day 0).

**Table S7 (cont.)** – Crude means and estimated changes in the percentage of methylation on days 0, 5, 30 and D\* (day of discharge for preterm infants or D90 for term infants) in both groups.

| CpG sites          | Day | Term newborns |                     | Preterm newborns |                     | Preterm compared to term infants |                   |                |         |
|--------------------|-----|---------------|---------------------|------------------|---------------------|----------------------------------|-------------------|----------------|---------|
|                    |     | Mean (SD)     | Change <sup>a</sup> | Mean (SD)        | Change <sup>a</sup> | beta                             | e <sup>beta</sup> | 95%CI          | p-value |
| CpG34              | D0  | 0.08 (0.49)   | -                   | 0.12 (0.58)      | -                   | -0.044                           | 0.957             | 0.915; 1.000   | 0.052   |
|                    | D5  | 0.14 (0.53)   | 0.0062              | 0.00 (0.00)      | -0.0098             |                                  |                   |                |         |
|                    | D30 | 0.00 (0.00)   | 0.0433              | 0.00 (0.00)      | -0.0408             |                                  |                   |                |         |
|                    | D*  | 0.29 (1.07)   | 0.1287              | 0.00 (0.00)      | -0.0587             |                                  |                   |                |         |
| CpG35              | D0  | 0.00 (0.00)   | -                   | 0.03 (0.20)      | -                   | -0.016                           | 0.984             | 0.962; 1.007   | 0.179   |
|                    | D5  | 0.00 (0.00)   | 0                   | 0.00 (0.00)      | -0.0018             |                                  |                   |                |         |
|                    | D30 | 0.00 (0.00)   | 0                   | 0.00 (0.00)      | -0.0091             |                                  |                   |                |         |
|                    | D*  | 0.00 (0.00)   | 0                   | 0.00 (0.00)      | -0.0161             |                                  |                   |                |         |
| CpG36              | D0  | 0.67 (1.98)   | -                   | 0.08 (0.38)      | -                   | -0.029                           | 0.971             | 0.953; 0.990   | 0.002   |
|                    | D5  | 0.30 (0.81)   | 0.1004              | 0.55 (1.77)      | 0.0005              |                                  |                   |                |         |
|                    | D30 | 3.78 (6.01)   | 0.9015              | 0.24 (0.84)      | 0.0027              |                                  |                   |                |         |
|                    | D*  | 1.83 (2.47)   | 4.3118              | 0.25 (0.80)      | 0.0063              |                                  |                   |                |         |
| CpG37              | D0  | 0.31 (1.13)   | -                   | 0.30 (1.41)      | -                   | -0.035                           | 0.965             | 0.928; 1.005   | 0.084   |
|                    | D5  | 0.19 (0.74)   | 0.0506              | 0.21 (0.81)      | -0.0154             |                                  |                   |                |         |
|                    | D30 | 1.50 (4.05)   | 0.4069              | 0.06 (0.39)      | -0.0789             |                                  |                   |                |         |
|                    | D*  | 1.23 (4.05)   | 1.5711              | 0.11 (0.49)      | -0.1446             |                                  |                   |                |         |
| CpG38              | D0  | 2.10 (2.45)   | -                   | 2.28 (2.87)      | -                   | -0.009                           | 0.991             | 0.978; 1.005   | 0.2121  |
|                    | D5  | 2.28 (2.28)   | 0.1234              | 1.82 (2.00)      | 0.0241              |                                  |                   |                |         |
|                    | D30 | 3.70 (3.96)   | 0.8517              | 1.70 (1.72)      | 0.1491              |                                  |                   |                |         |
|                    | D*  | 4.02 (3.72)   | 2.4924              | 2.83 (4.76)      | 0.3619              |                                  |                   |                |         |
| CpG39              | D0  | 1.40 (2.60)   | -                   | 2.06 (3.26)      | -                   | 0.001                            | 1.002             | 0.987; 1.017   | 0.850   |
|                    | D5  | 1.84 (2.31)   | -0.0672             | 1.24 (1.95)      | -0.0543             |                                  |                   |                |         |
|                    | D30 | 1.52 (3.46)   | -0.3647             | 1.12 (1.40)      | -0.2996             |                                  |                   |                |         |
|                    | D*  | 0.76 (1.51)   | -0.7261             | 1.14 (1.31)      | -0.6117             |                                  |                   |                |         |
| CpG40              | D0  | 0.00 (0.00)   | -                   | 0.61 (2.94)      | -                   | 0.043                            | 1.044             | 1.011; 1.078   | 0.009   |
|                    | D5  | 0.98 (2.66)   | -0.1160             | 0.71 (2.65)      | -0.0484             |                                  |                   |                |         |
|                    | D30 | 0.00 (0.00)   | -0.3794             | 0.31 (0.77)      | -0.2423             |                                  |                   |                |         |
|                    | D*  | 0.00 (0.00)   | -0.4516             | 0.24 (0.74)      | -0.4314             |                                  |                   |                |         |
| CpG41              | D0  | 0.00 (0.00)   | -                   | 0.13 (0.68)      | -                   | -0.036                           | 0.965             | 0.942; 0.989   | 0.0049  |
|                    | D5  | 0.00 (0.00)   | 0                   | 0.05 (0.30)      | -0.0150             |                                  |                   |                |         |
|                    | D30 | 0.00 (0.00)   | 0                   | 0.00 (0.00)      | -0.0606             |                                  |                   |                |         |
|                    | D*  | 0.00 (0.00)   | 0                   | 0.00 (0.00)      | -0.0846             |                                  |                   |                |         |
| CpG42              | D0  | 0.32 (0.94)   | -                   | 2.15 (3.04)      | -                   | 0.011                            | 1.012             | 0.984; 1.040   | 0.417   |
|                    | D5  | 1.97 (6.36)   | -0.0695             | 1.50 (1.49)      | -0.0379             |                                  |                   |                |         |
|                    | D30 | 0.11 (0.56)   | -0.3456             | 1.13 (1.32)      | -0.2153             |                                  |                   |                |         |
|                    | D*  | 0.31 (0.75)   | -0.6103             | 1.44 (1.42)      | -0.4589             |                                  |                   |                |         |
| CpG43              | D0  | 0.00 (0.00)   | -                   | 0.19 (0.76)      | -                   | 0.013                            | 1.013             | 0.973; 1.054   | 0.532   |
|                    | D5  | 0.14 (0.65)   | -0.0093             | 0.07 (0.40)      | -0.0125             |                                  |                   |                |         |
|                    | D30 | 0.00 (0.00)   | -0.0395             | 0.09 (0.32)      | -0.0607             |                                  |                   |                |         |
|                    | D*  | 0.00 (0.00)   | -0.0581             | 0.03 (0.18)      | -0.1045             |                                  |                   |                |         |
| CpG44              | D0  | 0.00 (0.00)   | -                   | 0.11 (0.66)      | -                   | 0.026                            | 1.027             | 0.984; 1.072   | 0.228   |
|                    | D5  | 0.22 (0.72)   | -0.0163             | 0.00 (0.00)      | -0.0030             |                                  |                   |                |         |
|                    | D30 | 0.00 (0.00)   | -0.0653             | 0.03 (0.17)      | -0.0162             |                                  |                   |                |         |
|                    | D*  | 0.00 (0.00)   | -0.0908             | 0.03 (0.15)      | -0.0315             |                                  |                   |                |         |
| CpG45              | D0  | 0.12 (0.46)   | -                   | 0.29 (1.01)      | -                   | 0.005                            | 1.005             | 0.965; 1.047   | 0.804   |
|                    | D5  | 0.24 (0.82)   | -0.0104             | 0.53 (1.17)      | -0.0183             |                                  |                   |                |         |
|                    | D30 | 0.00 (0.00)   | -0.0525             | 0.25 (0.64)      | -0.0982             |                                  |                   |                |         |
|                    | D*  | 0.08 (0.35)   | -0.0950             | 0.17 (0.48)      | -0.1932             |                                  |                   |                |         |
| CpG46              | D0  | 0.00 (0.00)   | -                   | 0.16 (0.91)      | -                   | 0.025                            | 1.025             | 0.981; 1.072   | 0.269   |
|                    | D5  | 0.29 (1.01)   | -0.0245             | 0.12 (0.60)      | -0.0100             |                                  |                   |                |         |
|                    | D30 | 0.00 (0.00)   | -0.0936             | 0.00 (0.00)      | -0.0495             |                                  |                   |                |         |
|                    | D*  | 0.00 (0.00)   | -0.1246             | 0.04 (0.25)      | -0.0869             |                                  |                   |                |         |
| CpG47              | D0  | 0.04 (0.23)   | -                   | 0.93 (2.79)      | -                   | -0.030                           | 0.970             | 0.946; 0.996   | 0.022   |
|                    | D5  | 0.41 (1.11)   | 0.0199              | 0.33 (0.68)      | -0.0234             |                                  |                   |                |         |
|                    | D30 | 0.46 (1.95)   | 0.1614              | 0.42 (0.70)      | -0.1279             |                                  |                   |                |         |
|                    | D*  | 0.94 (2.17)   | 0.6343              | 0.45 (0.67)      | -0.2578             |                                  |                   |                |         |
| <b>Total Meth.</b> | D0  | 0.40 (1.76)   | -                   | 0.54 (1.94)      | -                   | -0.013                           | 0.987             | -0.025; -0.001 | 0.034   |
|                    | D5  | 0.44 (1.90)   | 0.0151              | 0.36 (1.64)      | -0.0162             |                                  |                   |                |         |
|                    | D30 | 0.59 (2.33)   | 0.0981              | 0.27 (1.21)      | -0.0896             |                                  |                   |                |         |
|                    | D*  | 0.51 (2.09)   | 0.2592              | 0.28 (1.12)      | -0.1828             |                                  |                   |                |         |

<sup>a</sup>Change compared to D0 (day 0); Total Meth – total methylation
